# Supplementary material for: The metabolic demands of cancer cells are coupled to their size and protein synthesis rates
Source: PubMed Central journal article supplement (PMC4178206; doi:10.1186/2049-3002-1-20), 2013-11-07
Supplement: 2049-3002-1-20-S1.pdf [file 2049-3002-1-20-S1.pdf]

# **The metabolic demands of cancer cells are coupled to their size and protein synthesis rates**

Sonia C. Dolfi<sup>1</sup>, Leo Li-Ying Chan<sup>2</sup>, Jean Qiu<sup>2</sup>, Philip M. Tedeschi<sup>1</sup>, Joseph R. Bertino<sup>1</sup>, Kim M. Hirshfield<sup>1</sup>, Zoltán N. Oltvai<sup>3</sup>, Alexei Vazquez<sup>4,5,\*</sup>

<sup>1</sup>Department of Medicine, <sup>4</sup>Department of Radiation Oncology and <sup>5</sup>Center for Systems Biology, Rutgers Cancer Institute of New Jersey, Rutgers, The State University of New Jersey, New Brunswick, USA

<sup>2</sup>Department of Technology R&D, Nexcelom Bioscience LLC, Lawrence, MA, USA

<sup>3</sup>Department of Pathology, University of Pittsburgh School of Medicine, Pittsburgh, PA, USA

## **Outline**

- 2 Maximum likelihood estimate of the protein synthesis rate**
- 3 Average amino acid molecular weight in the expressed proteome**
- 4 Statistical test for volume dependence**
- 5 Personalized metabolic models**
- 12 Supplementary Figures**
- 16 Supplementary Tables**

## Maximum likelihood estimate of the protein synthesis rate

The experimentally measured import rates of an essential amino acid are assumed to be proportional to the protein synthesis rate:  $f_a = S_a f_P + \Delta f_a$ , where  $S_a$  is the relative content of amino acid  $a$  in proteome (Table S1),  $f_P$  is the rate of protein synthesis and  $\Delta f_a$  represents the variability introduced by the experimental procedures. We further assume that the experimental noise  $\Delta f_a$  follows a normal distribution with an amino acid dependent variance  $\sigma_a$ . Under these assumptions the probability to observe the reported exchange rates for essential amino acids is

$$(Eq. 1) \quad P(f | f_P, \sigma) = \prod_{a=1}^n \frac{1}{\sqrt{2\pi\sigma_a^2}} \exp\left(-\frac{(f_a - S_a f_P)^2}{2\sigma_a^2}\right)$$

where the product is restricted to essential amino acids and  $n$  is the number of essential amino acids. Maximizing (Eq. 1) with respect to  $f_P$  and  $\sigma_a$  we obtain their maximum likelihood estimates (MLE)

$$(Eq. 2) \quad f_P = \frac{\sum_{a=1}^n \frac{S_a f_a}{\sigma_a^2}}{\sum_{a=1}^n \frac{S_a^2}{\sigma_a^2}}$$

$$(Eq. 3) \quad \sigma_a^2 = \frac{1}{n} \sum_{a=1}^n (f_a - S_a f_P)^2$$

We solve these equations recursively, starting from the assumption that the measurements of all amino acids exchanges have the same variance

$$(Eq. 4) \quad \sigma_a(0) = \sigma$$

$$(Eq. 5) \quad f_P(0) = \frac{\sum_{a=1}^n S_a f_a}{\sum_{a=1}^n S_a^2}$$

Then, recursively, we compute first  $\sigma_a(t)$  using as input  $f_P(t-1)$  and then  $f_P(t)$  using as input  $\sigma_a(t)$ . We continue this procedure until the relative error:  $\varepsilon = \text{abs}(f_P(t) - f_P(t-1)) / f_P(t)$  is smaller than  $10^{-6}$ .

The MLE estimates for  $f_P$  and  $\sigma_a$  are reported in Tables S5 and S6, respectively.

## Average amino acid molecular weight in the expressed proteome

The average amino acid molecular weight in the expressed proteome was calculated as

$$w_{aa} = \sum_a S_a W_a$$

where  $S_a$  is the abundance of amino acid  $a$  in the expressed proteome and  $W_a$  is its molecular weight, as reported in Refs. [9, 21].

## Statistical test for volume dependence

Given a test quantity  $Y_i$  (protein content, DNA content or protein synthesis rate) measured across  $i=1, \dots, n$  cell lines with cell volumes  $V_i$ , we assume that  $Y_i = \mu V_i^\alpha + \sigma V_i^\beta X_i$ , where  $\mu$  and  $\sigma$  are model parameters and  $\alpha=\beta=0$  for the I model,  $\alpha=1$  and  $\beta=0$  for the VDM model, and  $\alpha=\beta=1$  for the VDMV model, and  $X_i$  are independent random variables with a standard normal distribution. The likelihood to observe the data  $Y_i$  given these models is

$$P(Y | \mu, \sigma) = \prod_{i=1}^n \frac{1}{\sqrt{2\pi\sigma^2 V_i^\beta}} \exp\left(-\frac{(Y_i - \mu V_i^\alpha)^2}{2\sigma^2 V_i^\beta}\right)$$

For each model, we assign to  $\mu$  and  $\sigma$  their maximum log-likelihood  $L = \ln P(Y | \mu, \sigma)$ , obtaining

$$\mu_{MLE} = \frac{\sum_{i=1}^n Y_i V_i^{\alpha-\beta}}{\sum_{i=1}^n V_i^{2\alpha-\beta}}$$

$$\sigma_{MLE}^2 = \frac{1}{n} \sum_{i=1}^n \frac{(Y_i - \mu_{MLE} V_i^\alpha)^2}{V_i^\beta}$$

The validity of each model is then quantified applying a Shapiro-Wilk normality test to

$$X_i = \frac{Y_i - \mu_{MLE} V_i^\alpha}{\sigma_{MLE} V_i^{\beta/2}}$$

A model is rejected if the resulting statistical significance falls below 0.05.

## Personalized metabolic models

As starting point, we utilize a genome-scale metabolic reconstruction of a generic human cell [1] that includes most biochemical reactions catalyzed by enzymes encoded in the human genome. We add auxiliary reactions to represent nutrient uptake, excretion of metabolic byproducts, basal ATP demand needed for cell maintenance, basal rate of protein degradation, and synthesis of cell biomass components (proteins, lipids, RNA and DNA) (Vazquez et al [2], Table S1). We assume that the cell is in a steady state where the production and consumption of every metabolite and macromolecules balances, known as the flux balance constraint [1]. We use  $S_{mi}$  to denote the stoichiometric coefficient of metabolite  $m$  in reaction  $i$ . We use  $F_i$  to denote the net steady state reaction rate (flux) of the  $i^{\text{th}}$  reaction per cell, where all reversible reactions are represented by a forward and backward rate, respectively. Reactions are divided into nutrient import reactions ( $I$ ), reactions taking place in the cytosol ( $C$ ) and reactions taking place in the mitochondria ( $M$ ). We use  $\phi_c$  to denote the relative cell volume fraction occupied by the  $c^{\text{th}}$  cellular compartment. In particular, we denote by  $N_0$  the non-metabolic protein content per cell and by  $\phi_0$  its occupied volume fraction. We assume the proliferation rate ( $\mu$ ) and the relative volume fraction occupied by macromolecules and organelles ( $\phi_{max}$ ) are known and are given as input parameters of the model. Finally, we estimate the metabolic fluxes and compartment densities as the solution of the following optimization problem:

Find the  $F_i$  and  $\phi_c$  that maximize the total content of non-metabolic protein

$$(1) \quad N_0$$

subject to the metabolic constraints: flux balance constraints

$$(2) \quad \sum_i S_{mi} F_i = 0$$

minimum/maximum flux constraints

$$(3) \quad v_{i,\min} \leq F_i \leq v_{i,\max}$$

minimum/maximum volume fraction constraints

$$(4) \quad 0 \leq \phi_c \leq \phi_{\max}$$

molecular crowding constraints

$$\begin{aligned}
(5) \quad & \sum_{i \in C} a_i F_i \leq \phi_C V \\
& \sum_{i \in M} a_i F_i \leq \phi_M V \\
& a_{M,ATP} \sum_{i \in M | S_{ATP,i} > 0} S_{ATP,i} F_i \leq \phi_M V \\
& \phi_0 + \phi_C + \phi_M \leq \phi_{\max}
\end{aligned}$$

where  $V$  is the cell volume,  $c_i$  is the nutrient import cost associated with the uptake reaction  $i$ ,  $a_i = v_i / k_{eff,i}$  are the crowding coefficients of metabolic enzymes (enzyme molar volume / enzyme effective turnover)[3], and  $a_{M,ATP} = v_{s,M} / r_M$  the crowding coefficient of mitochondria ATP generation (ATP synthesis rate per mitochondria mass / mitochondria specific volume) [4, 5]. As a difference with our previous work [2], here we express the metabolic fluxes  $F_i$  in units of mol/cell/hour. We can recover our previous equations recalling that the metabolic flux per cell volume is given by  $f_i = F_i / V$ .

### *Personalized models*

The model is tailored for each cell line by specifying the proliferation rate  $\mu$ , the cell volume  $V$ , the DNA content and the reported exchange fluxes. The model reaction fluxes representing exchange fluxes are fixed to the experimentally measure values, by setting  $v_{i,min} = v_{i,max} = F_{i,reported}$ .

### *Proliferation rate*

The doubling time  $t_D$  of each cell line in the NCI60 panel was obtained from the Developmental Therapeutics Program at the NCI ([http://dtp.nci.nih.gov/docs/misc/common\\_files/cell\\_list.html](http://dtp.nci.nih.gov/docs/misc/common_files/cell_list.html)). Proliferation rates were computed as  $\mu = \ln(2) / t_D$ .

### *Nuclear DNA content*

The nuclear DNA content of each cell line in the NCI60 panel was estimated using the reported karyotypes for these cell lines [6] and the chromosome lengths reported by Ensembl. Specifically, using the reported copy number for each chromosome band we calculated an average karyotype for each chromosome. Multiplying the average chromosome karyotype by the chromosome length in base pairs and summing over all chromosomes we obtained the DNA content in base pairs (nucleotides/cell). The latter was converted to mol/cell after dividing by the Avogadro number.

The nuclear DNA content of a normal cell was calculated similarly, using as input the normal chromosomes copy number.

### *Mitochondrial DNA*

The mitochondrial DNA (mtDNA) was assumed proportional to the mitochondrial volume, with a density of 0.3 fmol of mtDNA/pL. The density was calculated based on the reported mitochondrial DNA ( $\sim 0.75 \mu\text{g}/10^6$  cells) and protein ( $\sim 2.5 \text{ mg}/10^6$  cells) content in chick embryo fibroblasts (Table III in Ref. [7]). Dividing the mtDNA mass per cell by the average DNA molecular weight ( $\sim 331 \text{ g/mol}$ ) we obtain a density of 2.3 fmol mtDNA/cell, and dividing by the mitochondrial protein content a density of  $0.92 \mu\text{mol mtDNA/g}$  of mitochondrial protein. Multiplying the latter number by the specific volume of mitochondria ( $2.6 \text{ mL/g protein}$  [8]), we obtain a density of 0.3 fmol mtDNA/pL of mitochondria.

### *RNA*

The RNA composition was estimated by their relative abundance per cell dry weight [9]. The abundance per cell dry weight were converted to abundance per cell volume after dividing by the typical cell specific volume  $4.3 \text{ mL/g}$  [10]. The abundance per cell volume was finally converted to abundance per cell by multiplying by our measurements of cell volume for each of the cell lines on the NCI60 panel.

### *Lipids*

The lipids composition was estimated by their relative abundance per cell dry weight [9]. The abundance per cell dry weight were converted to abundance per cell volume after dividing by the typical cell specific volume  $4.3 \text{ mL/g}$  [10]. The abundance per cell volume was finally converted to abundance per cell by multiplying by our measurements of cell volume for each of the cell lines on the NCI60 panel.

### *Protein content*

Proteins are divided into cytosolic and mitochondrial proteins. Within the cytosol, proteins were divided into three pools: ribosomal-, components of metabolic enzyme complexes-, and non-metabolic proteins. Each ribosome contributes to  $n_{PR}=82$  proteins/ribosome (49 in the 60S and 33 in the 40S subunits [11]). The ribosome related protein concentration was computed as  $P_{CR}=n_{PR}f_{CP}/k_R$ , where  $f_{CP}$  is the cytosolic protein synthesis rate and  $k_R$  the protein synthesis rate per ribosome. Each enzyme contributes with  $n_{PE}=2.4$  proteins in average, estimated as median enzyme molecular weight ( $98,750 \text{ g/mol}$ , reported above) divided by the median molecular weight of a human protein ( $40,835 \text{ g/mol}$ ). The median molecular weight of a human protein was estimated from the median protein length (355 amino acids [12]) and the typical amino acid composition [9]. The enzyme related cytosolic protein concentration was computed as  $P_{CE}=\sum_i n_{PE}f_i/k_i$ . A similar subdivision is carried on for mitochondrial

proteins.

### *Kinetic parameters*

The effective turnover numbers,  $k_{eff,i}$ , quantify the reaction rate per enzyme molecule. For example, for an irreversible single substrate reaction satisfying Michaelis-Menten kinetics,  $k_{eff}=kS/(K+S)$ , where  $k$  is the enzyme turnover number,  $K$  the half-saturation concentration and  $S$  the substrate concentration. The turnover numbers of some human enzymes are reported in the BRENDA database [13]. They have a typical value of  $10 \text{ sec}^{-1}$  and a significant variation from  $1$  to  $100 \text{ sec}^{-1}$  (Vazquez et al [2], Table S2). However, for most reactions we do not know the turnover number, the kinetic model, or the metabolite concentrations, impeding us to estimate  $k_{eff}$ . To cope with this indeterminacy we performed a sampling strategy, whereby the  $k_{eff,i}$  were sampled from a reasonable range of values, and then focused on median and the 90% confidence intervals (see Sensitivity analysis below).

### *Crowding coefficients*

Dividing the mitochondrion specific volume (3.15 mL/g in mammalian liver [14] and 2.6 mL/g in muscle [8]) by the rate of ATP production per mitochondrial mass (0.1-1.0 mmol ATP/min/g [15-17]) we obtain  $a_M$  values between 0.0026 to 0.032 min/mM. Except when specified, we use the median 0.017 min/mM. Dividing the ribosome molar volume ( $v_R = 4,000 \text{ nm}^3 \times 6.02 \cdot 10^{23}/\text{mol}=2.4 \text{ L}/\text{mmol}$ ) by the rate of protein synthesis per ribosome (0.67 proteins/min [18]) we obtain  $a_R=3.6 \text{ min}/\text{mM}$ . The enzyme crowding coefficients were estimated as  $a_i=v_E/k_i$ . Multiplying the median molecular weight of human enzymes (98,750 g/mol, Vazquez et al [2], Table S2) by the enzymes specific volume (approximated by the specific volume of spherical proteins, 0.79 mL/g [19]) we obtain an estimated enzymes molar volume of  $v_E=0.078 \text{ L}/\text{mmol}$ .

### *Maximum macromolecular density*

The maximum macromolecular density cannot exceed 100% of the cell volume, therefore  $\phi_{max}=1$ . We have previously used the upper bound of 0.4 based on the typical macromolecular density of cells. However, there may be some variability among cancer cell lines. Furthermore, the constraint over the exchange fluxes of essential amino acids determines the protein content, which is the major component of the cell biomass.

### *Protein synthesis*

The flux balance equation for proteins synthesized in the cytosol is formulated as follows. We account for three major categories, proteins not associated with metabolism, proteins that are components of



enzyme complexes and that are encoded in nuclear genes, and the cytosol ribosomal proteins, with their concentrations (moles/cell volume) denoted by  $P_0$ ,  $P_{NE}$ , and  $P_{CR}$ , respectively. In proliferating cells, these concentrations will decrease at a rate  $(\mu+k_D)(P_0+P_{NE}+P_{CR})$ , where  $\mu$  represents the contribution to cell growth and  $k_D=0.01/\text{h}$  [20] is the basal protein turnover rate. Putting all these elements together, the balance between protein turnover and synthesis implies  $f_{CP}-k_D[P_0+ n_{PE}\sum_i(f_i/k_{eff,i}) + n_{PR}f_{CP}/k_R]=0$ , where the index  $i$  runs over all enzyme catalyzed reactions excluding ATP synthase, NADH dehydrogenase, complex III, and complex IV. In a similar manner we formulated the flux balance equation for mitochondrial proteins encoded in the mitochondrial DNA. The mitochondrial protein synthesis reaction accounted for the synthesis of ATP synthase, NADH dehydrogenase, complex III, complex IV and the mitochondria ribosomes.

### *DNA synthesis*

We explicitly considered a nuclear and a mitochondrial DNA synthesis reaction, each matching the DNA synthesis demands of their respective compartment upon cell proliferation.

### *Flux bounds*

All reversible reactions were represented by an irreversible reaction on each direction with their own effective turnover number  $k_{eff,i}$ . Flux bounds were set to  $v_{i,min}=0$  and  $v_{i,max}=\infty$ , except for reported exchange fluxes ( $v_{i,min}=v_{i,max}=F_{i,reported}$ ) and for the auxiliary reactions representing the basal rate of protein turn over ( $v_{i,min}=v_{i,max}=k_D$ ) and the biomass production reaction ( $v_{i,min}=v_{i,max}=\mu$ ).

### *Simulations*

The optimization problem in equations (1)-(5) was solved in Matlab, using the linear programming function `linprog`.

### *Sensitivity analysis*

The turnover numbers of human enzymes  $k$  have significant variations from 1 to 100  $\text{sec}^{-1}$  and the distribution of  $\log_{10}(k)$  is approximately uniform in this range (Vazquez et al [2], Table S2). Based on this data we sampled the  $\log_{10}(k_{eff})$  values from a uniform distribution in the range between  $\log_{10}(1)$  to  $\log_{10}(100)$ . For each specified condition we run 100 simulations. On each simulation, for each reaction, a value of  $k_{eff,i}$  is extracted from the distribution described above. With this set of  $k_{eff,i}$  parameters we then solve the optimization problem (1)-(5) and obtain estimates for the reaction rates. Based on the 100 simulations we finally estimate the median and 90% confident intervals for the rate of each reaction. 100 simulations were proven to be sufficient to capture the overall range of behavior, since

running 1,000 simulations did not result in a significant change in the median and 90% confidence intervals.

## References

1. Mo ML, Jamshidi N, Palsson BO: **A genome-scale, constraint-based approach to systems biology of human metabolism.** *Mol Biosyst* 2007, **3**(9):598-603.
2. Vazquez A, Markert EK, Oltvai ZN: **Serine biosynthesis with one carbon catabolism and the glycine cleavage system represents a novel pathway for ATP generation.** *Plos One* 2011, **6**(11):e25881.
3. Vazquez A, de Menezes MA, Barabasi AL, Oltvai ZN: **Impact of limited solvent capacity on metabolic rate, enzyme activities, and metabolite concentrations of *S. cerevisiae* glycolysis.** *PLoS Comput Biol* 2008, **4**(10):e1000195.
4. Vazquez A, Liu J, Zhou Y, Oltvai ZN: **Catabolic efficiency of aerobic glycolysis: The Warburg effect revisited.** *BMC Syst Biol* 2010, **4**:58.
5. Vazquez A, Oltvai ZN: **Molecular crowding defines a common origin for the warburg effect in proliferating cells and the lactate threshold in muscle physiology.** *Plos One* 2011, **6**(4):e19538.
6. Roschke AV, Tonon G, Gehlhaus KS, McTyre N, Bussey KJ, Lababidi S, Scudiero DA, Weinstein JN, Kirsch IR: **Karyotypic complexity of the NCI-60 drug-screening panel.** *Cancer Res* 2003, **63**(24):8634-8647.
7. D'Agostino MA, Nass MM: **Specific changes in the synthesis of mitochondrial DNA in chick embryo fibroblasts transformed by Rous sarcoma viruses.** *J Cell Biol* 1976, **71**(3):781-794.
8. Schwerzmann K, Hoppeler H, Kayar SR, Weibel ER: **Oxidative capacity of muscle and mitochondria: correlation of physiological, biochemical, and morphometric characteristics.** *Proc Natl Acad Sci U S A* 1989, **86**(5):1583-1587.
9. Sheikh K, Forster J, Nielsen LK: **Modeling hybridoma cell metabolism using a generic genome-scale metabolic model of *Mus musculus*.** *Biotechnol Prog* 2005, **21**(1):112-121.
10. Frame KK, Hu WS: **Cell volume measurement as an estimation of mammalian cell biomass.** *Biotechnol Bioeng* 1990, **36**(2):191-197.
11. Alberts B: **Molecular biology of the cell**, 5th edition. edn. New York, N.Y.,: Garland Science; 2008.
12. Brocchieri L, Karlin S: **Protein length in eukaryotic and prokaryotic proteomes.** *Nucleic Acids Res* 2005, **33**(10):3390-3400.
13. Schomburg I, Chang A, Schomburg D: **BRENDA, enzyme data and metabolic information.** *Nucleic Acids Res* 2002, **30**(1):47-49.
14. Glas U, Bahr GF: **Quantitative study of mitochondria in rat liver. Dry mass, wet mass, volume, and concentration of solids.** *J Cell Biol* 1966, **29**(3):507-523.
15. Wibom R, Hultman E, Johansson M, Matherei K, Constantin-Teodosiu D, Schantz PG: **Adaptation of mitochondrial ATP production in human skeletal muscle to endurance training and detraining.** *J Appl Physiol* 1992, **73**(5):2004-2010.
16. Short KR, Nygren J, Barazzoni R, Levine J, Nair KS: **T(3) increases mitochondrial ATP production in oxidative muscle despite increased expression of UCP2 and -3.** *Am J Physiol Endocrinol Metab* 2001, **280**(5):E761-769.
17. Hou XY, Green S, Askew CD, Barker G, Green A, Walker PJ: **Skeletal muscle mitochondrial ATP production rate and walking performance in peripheral arterial disease.** *Clin Physiol*

- Funct Imaging* 2002, **22**(3):226-232.
18. Princiotta MF, Finzi D, Qian SB, Gibbs J, Schuchmann S, Buttgerit F, Bennink JR, Yewdell JW: **Quantitating protein synthesis, degradation, and endogenous antigen processing.** *Immunity* 2003, **18**(3):343-354.
  19. Lee B: **Calculation of volume fluctuation for globular protein models.** *Proc Natl Acad Sci U S A* 1983, **80**(2):622-626.
  20. Savinell JM, Palsson BO: **Network analysis of intermediary metabolism using linear optimization. I. Development of mathematical formalism.** *J Theor Biol* 1992, **154**(4):421-454.
  21. Duarte NC, Becker SA, Jamshidi N, Thiele I, Mo ML, Vo TD, Srivas R, Palsson BO: **Global reconstruction of the human metabolic network based on genomic and bibliomic data.** *Proc Natl Acad Sci U S A* 2007, **104**(6):1777-1782.
  22. Holbeck SL, Collins JM, Doroshow JH: **Analysis of Food and Drug Administration-approved anticancer agents in the NCI60 panel of human tumor cell lines.** *Mol Cancer Ther* 2010, **9**(5):1451-1460.

## Supplementary Figures

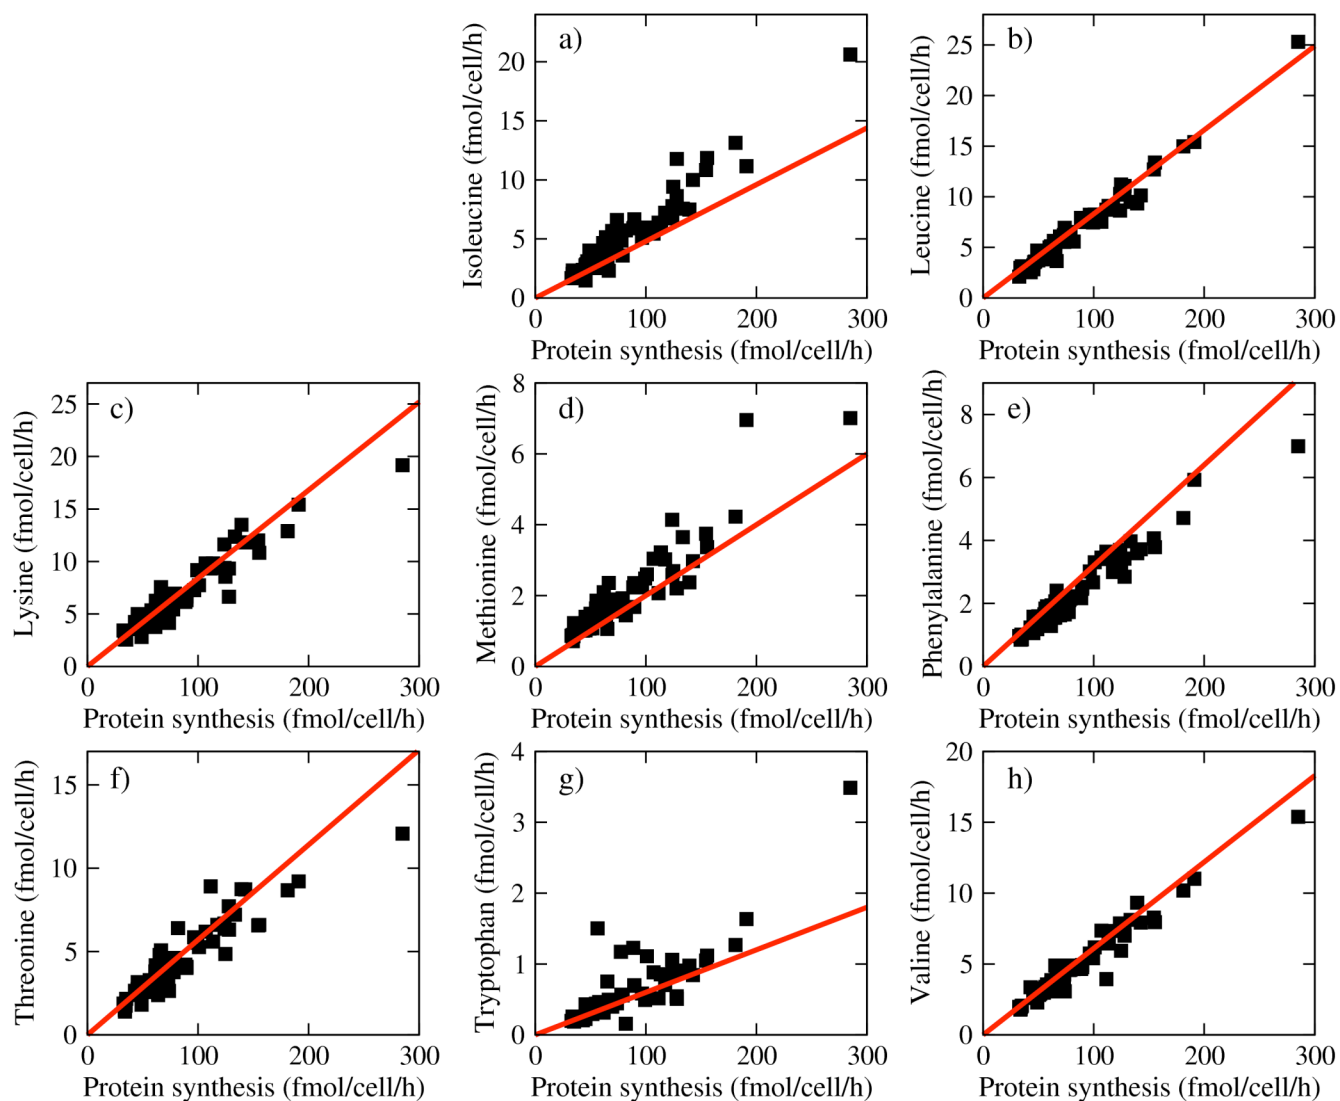

**Figure S1: Import rate of essential amino acids as a function of the MLE protein synthesis rate.**

a-h) Each square symbol represents a cell line from the NCI60 panel and the red solid line represents the expected ratio as determined from the relative amino acid abundance.

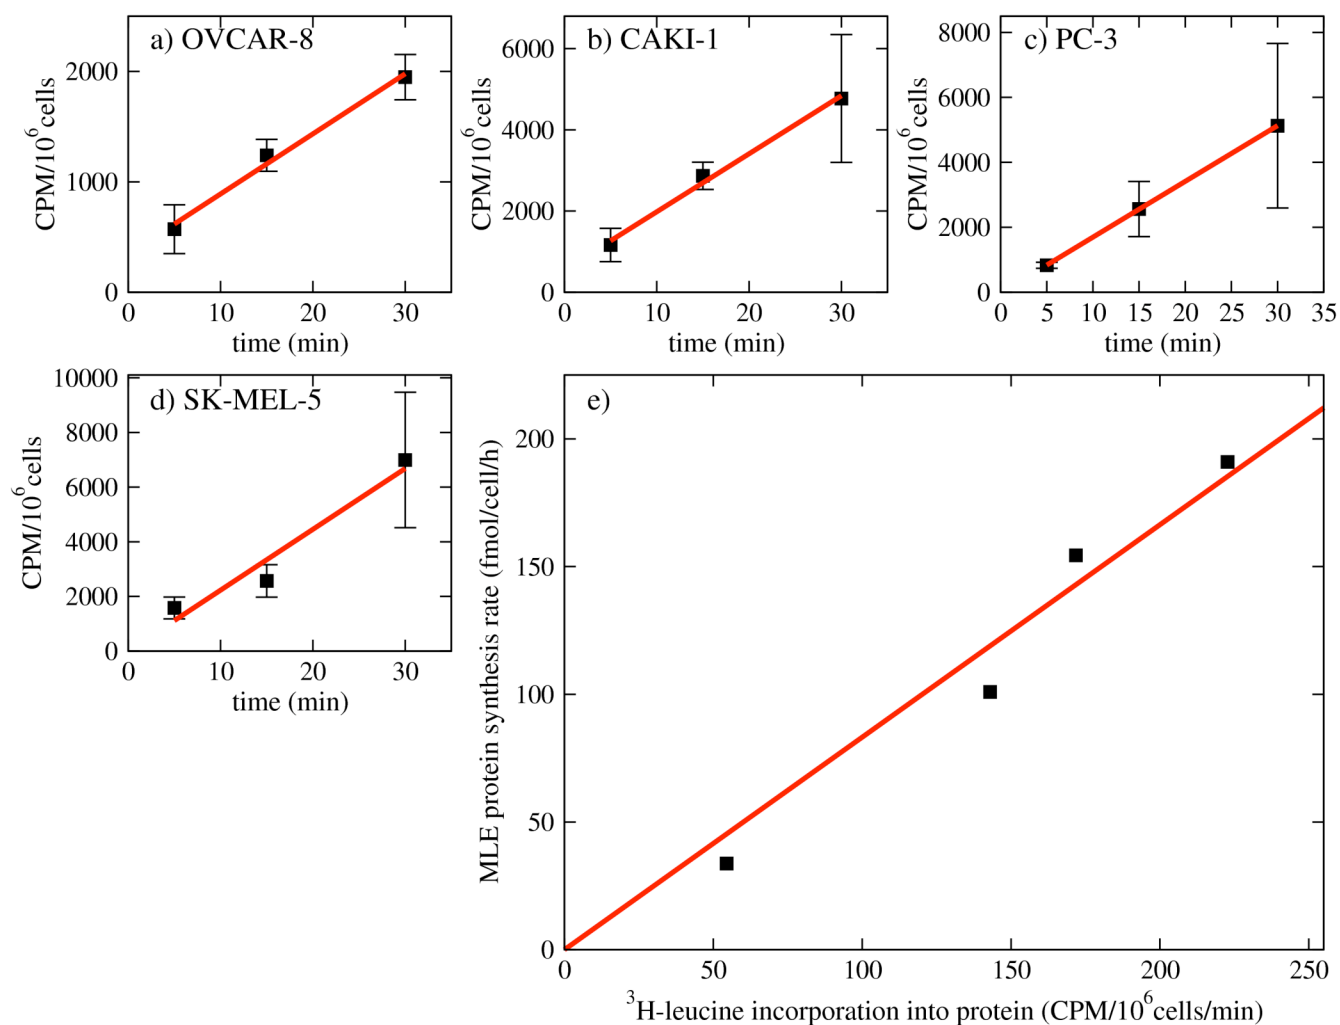

**Figure S2: Validation of the MLE protein synthesis rates.** a-d) [4,5-<sup>3</sup>H]-leucine incorporation into protein as a function of time for four selected cell lines. The red lines are linear fits to the data points. e) The MLE protein synthesis rate as a function of the [4,5-<sup>3</sup>H]-leucine incorporation rate into protein. Each data point represents a cancer cell line and the solid line represents a linear fit intercepting the origin.

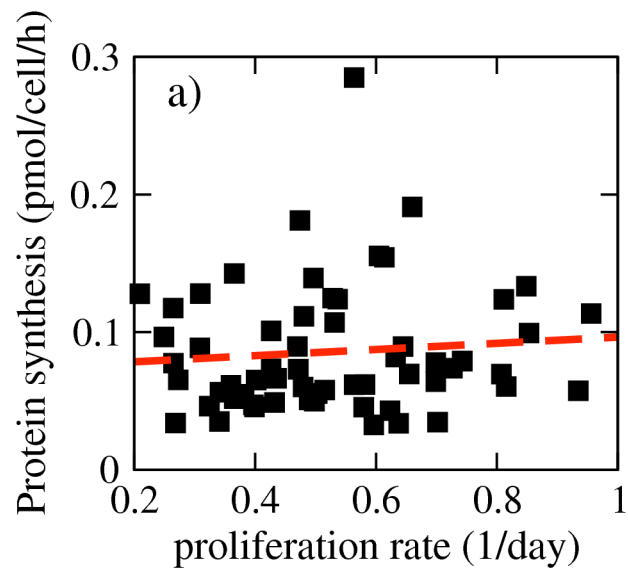

**Figure S3: Protein synthesis rate per cell as a function of the proliferation rate.** Each square symbol represents a cell line from the NCI60 panel and the dashed red line is a linear fit to the data points.

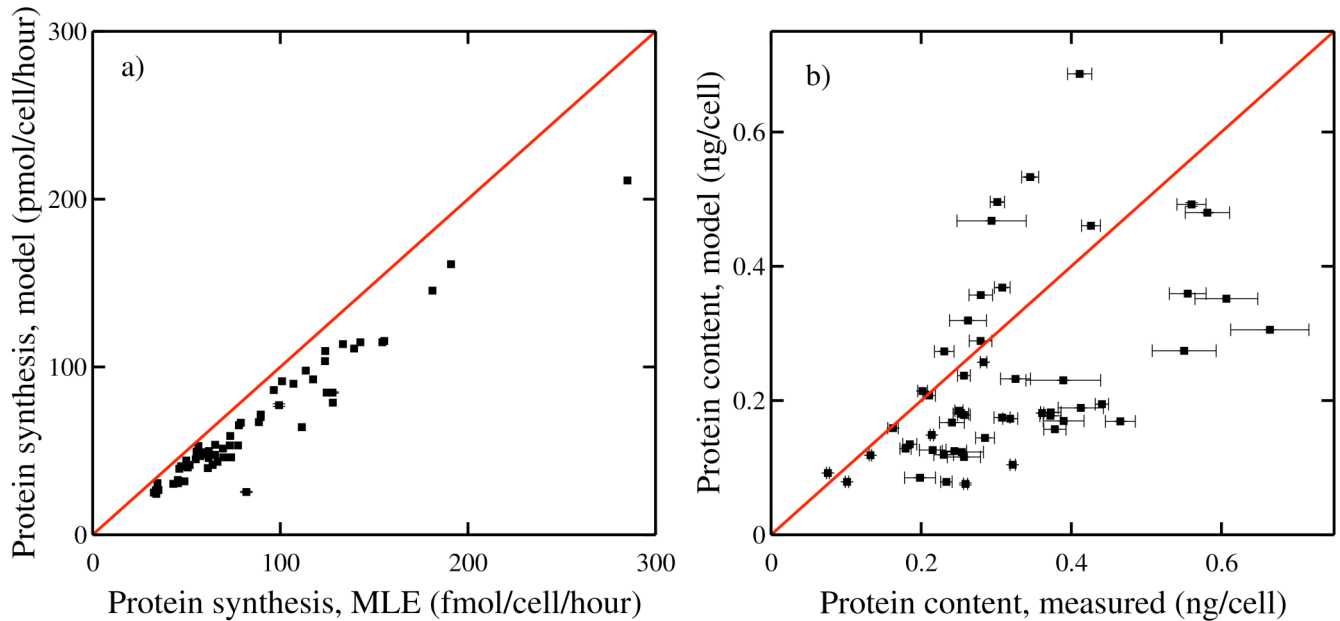

**Figure S4: Correlation of measured and estimated protein contents.** a) Scatter plot of the model predicted protein synthesis rate vs the MLE protein synthesis rate. b) Scatter plot of the model predicted protein content vs the measured protein content. Each point represents a cell line and the diagonal line represents the case when both values are equal. Although they are not visible due to their small size, there are vertical error bars representing the 90% confidence interval due to variations in the model kinetic parameters. The horizontal error bars in panel b) represent the standard deviation of the protein content measurements.

## Supplementary Tables

| Amino acid    | $S_a$ (mol/mol) |
|---------------|-----------------|
| histidine     | 0.021           |
| isoleucine    | 0.048           |
| leucine       | 0.083           |
| lysine        | 0.084           |
| methionine    | 0.020           |
| phenylalanine | 0.032           |
| threonine     | 0.057           |
| tryptophan    | 0.006           |
| valine        | 0.061           |
| alanine       | 0.088           |
| arginine      | 0.055           |
| asparagine    | 0.042           |
| aspartate     | 0.053           |
| cysteine      | 0.021           |
| glutamate     | 0.057           |
| glutamine     | 0.047           |
| glycine       | 0.079           |
| proline       | 0.046           |
| serine        | 0.063           |
| tyrosine      | 0.027           |

**Table S1:** Relative abundance of essential and non-essential amino acids in the expressed proteome [9, 21].



**Table S2: Genes whose expression correlates with cell volume.** The list of Affymetrix HG-U133 Plus 2.0 array probes whose expression values were highly correlated with the cell volumes ( $PCC > 0.5$ ) or highly negatively correlated with the cell volume ( $PCC < -0.5$ ) in the NCI60 cell lines.

| Positively correlated |           |            |          | Negatively correlated |           |            |          |
|-----------------------|-----------|------------|----------|-----------------------|-----------|------------|----------|
| Probe                 | Gene      | <i>PCC</i> | <i>p</i> | Probe                 | Gene      | <i>PCC</i> | <i>p</i> |
| 200757 s at           | CALU      | 0.65       | 0.00E+00 | 200773 x at           | PTMA      | -0.68      | 0.00E+00 |
| 200756 x at           | CALU      | 0.63       | 0.00E+00 | 219067 s at           | NSMCE4A   | -0.66      | 0.00E+00 |
| 201828 x at           | FAM127A   | 0.61       | 0.00E+00 | 216515 x at           | PTMA      | -0.66      | 1.00E-06 |
| 200755 s at           | CALU      | 0.60       | 0.00E+00 | 202521 at             | CTCF      | -0.63      | 0.00E+00 |
| 214845 s at           | CALU      | 0.60       | 0.00E+00 | 209753 s at           | TMPO      | -0.62      | 0.00E+00 |
| 202733 at             | P4HA2     | 0.60       | 0.00E+00 | 208549 x at           | LOC441454 | -0.61      | 0.00E+00 |
| 200665 s at           | SPARC     | 0.59       | 0.00E+00 | 224944 at             | TMPO      | -0.61      | 1.00E-06 |
| 209578 s at           | POFUT2    | 0.59       | 0.00E+00 | 211376 s at           | NSMCE4A   | -0.60      | 0.00E+00 |
| 225303 at             | KIRREL    | 0.59       | 0.00E+00 | 203388 at             | ARRB2     | -0.60      | 1.00E-06 |
| 212509 s at           | MXRA7     | 0.59       | 0.00E+00 | 209754 s at           | TMPO      | -0.59      | 4.00E-06 |
| 206050 s at           | RNH1      | 0.58       | 3.00E-06 | 201038 s at           | ANP32A    | -0.59      | 0.00E+00 |
| 213455 at             | FAM114A1  | 0.58       | 3.00E-06 | 203276 at             | LMNB1     | -0.59      | 1.00E-05 |
| 226697 at             | FAM114A1  | 0.58       | 0.00E+00 | 218911 at             | YEATS4    | -0.57      | 5.00E-06 |
| 202133 at             | WWTR1     | 0.57       | 0.00E+00 | 212316 at             | NUP210    | -0.57      | 3.00E-06 |
| 201885 s at           | CYB5R3    | 0.57       | 0.00E+00 | 231810 at             | BRI3BP    | -0.57      | 1.00E-06 |
| 225331 at             | CCDC50    | 0.57       | 0.00E+00 | 211921 x at           | PTMA      | -0.57      | 0.00E+00 |
| 225803 at             | FBXO32    | 0.57       | 9.00E-06 | 241968 at             | -         | -0.56      | 0.00E+00 |
| 210757 x at           | DAB2      | 0.57       | 4.00E-06 | 200772 x at           | PTMA      | -0.56      | 0.00E+00 |
| 201172 x at           | ATP6V0E1  | 0.57       | 2.00E-06 | 210053 at             | TAF5      | -0.56      | 1.00E-06 |
| 212119 at             | RHOQ      | 0.57       | 0.00E+00 | 212479 s at           | RMND5A    | -0.56      | 1.10E-05 |
| 200096 s at           | ATP6V0E1  | 0.57       | 0.00E+00 | 213947 s at           | NUP210    | -0.55      | 2.00E-06 |
| 203827 at             | WIPI1     | 0.56       | 3.00E-06 | 203209 at             | RFC5      | -0.55      | 6.00E-06 |
| 200885 at             | RHOC      | 0.56       | 4.00E-06 | 224753 at             | CDCA5     | -0.55      | 1.30E-05 |
| 203167 at             | TIMP2     | 0.56       | 1.00E-06 | 203856 at             | VRK1      | -0.55      | 9.00E-06 |
| 201279 s at           | DAB2      | 0.56       | 5.00E-06 | 202503 s at           | KIAA0101  | -0.54      | 2.00E-06 |
| 200787 s at           | PEA15     | 0.56       | 0.00E+00 | 202387 at             | BAG1      | -0.54      | 6.00E-06 |
| 212120 at             | RHOQ      | 0.56       | 0.00E+00 | 222264 at             | HNRNPUL2  | -0.54      | 2.00E-06 |
| 219637 at             | ARMC9     | 0.56       | 1.00E-06 | 203302 at             | DCK       | -0.54      | 6.00E-06 |
| 212658 at             | LHFPL2    | 0.55       | 9.00E-06 | 223154 at             | MRPL1     | -0.54      | 2.00E-06 |
| 202555 s at           | MYLK      | 0.55       | 0.00E+00 | 201969 at             | NASP      | -0.54      | 1.20E-05 |
| 212722 s at           | JMJD6     | 0.55       | 1.40E-05 | 202107 s at           | MCM2      | -0.54      | 4.00E-06 |
| 227628 at             | GPX8      | 0.55       | 0.00E+00 | 216384 x at           | LOC643287 | -0.53      | 9.00E-06 |
| 200788 s at           | PEA15     | 0.55       | 0.00E+00 | 204026 s at           | ZWINT     | -0.53      | 4.00E-06 |
| 231579 s at           | TIMP2     | 0.55       | 0.00E+00 | 228569 at             | PAPOLA    | -0.53      | 4.00E-06 |
| 228564 at             | LOC375295 | 0.55       | 3.00E-06 | 223268 at             | C11orf54  | -0.53      | 0.00E+00 |
| 202134 s at           | WWTR1     | 0.55       | 1.00E-06 | 224760 at             | SP1       | -0.53      | 3.00E-06 |
| 200782 at             | ANXA5     | 0.55       | 0.00E+00 | 222103 at             | ATF1      | -0.53      | 3.00E-06 |
| 224823 at             | MYLK      | 0.54       | 9.00E-06 | 200047 s at           | YY1       | -0.53      | 1.40E-05 |
| 211433 x at           | KIAA1539  | 0.54       | 1.80E-05 | 200091 s at           | RPS25     | -0.53      | 3.00E-06 |
| 200663 at             | CD63      | 0.54       | 5.00E-06 | 206687 s at           | PTPN6     | -0.53      | 7.00E-06 |
| 218618 s at           | FNDC3B    | 0.54       | 6.00E-06 | 225716 at             | -         | -0.53      | 2.40E-05 |
| 231907 at             | -         | 0.54       | 7.00E-06 | 215947 s at           | FAM136A   | -0.53      | 2.00E-05 |
| 201278 at             | DAB2      | 0.54       | 2.00E-05 | 215136 s at           | EXOSC8    | -0.53      | 1.50E-05 |
| 209264 s at           | TSPAN4    | 0.53       | 3.00E-06 | 212482 at             | RMND5A    | -0.53      | 5.00E-06 |
| 208684 at             | COPA      | 0.53       | 1.70E-05 | 218448 at             | C20orf11  | -0.53      | 1.00E-06 |
| 224560 at             | TIMP2     | 0.53       | 0.00E+00 | 213054 at             | -         | -0.53      | 5.00E-06 |
| 203262 s at           | FAM50A    | 0.53       | 8.00E-06 | 235138 at             | VPS35     | -0.52      | 3.00E-06 |
| 200614 at             | CLTC      | 0.53       | 8.00E-06 | 217956 s at           | ENOPH1    | -0.52      | 4.50E-05 |
| 225032 at             | FNDC3B    | 0.53       | 6.00E-06 | 219188 s at           | MACROD1   | -0.52      | 4.10E-05 |
| 204140 at             | TPST1     | 0.53       | 2.20E-05 | 227586 at             | TMEM170A  | -0.52      | 1.40E-05 |
| 201616 s at           | CALD1     | 0.53       | 1.10E-05 | 209421 at             | MSH2      | -0.52      | 1.10E-05 |
| 200700 s at           | KDEL2     | 0.53       | 1.00E-06 | 201930 at             | MCM6      | -0.52      | 3.40E-05 |
| 200770 s at           | LAMC1     | 0.53       | 1.00E-06 | 208808 s at           | HMGB2     | -0.52      | 2.80E-05 |
| 219390 at             | FKBP14    | 0.53       | 1.20E-05 | 202690 s at           | SNRPD1    | -0.52      | 7.00E-06 |
| 226801 s at           | LOC646890 | 0.53       | 3.10E-05 | 201051 at             | ANP32A    | -0.52      | 1.10E-05 |
| 229017 s at           | DSTYK     | 0.53       | 3.00E-05 | 222214 at             | -         | -0.52      | 2.00E-06 |

|             |          |      |          |  |             |          |       |          |
|-------------|----------|------|----------|--|-------------|----------|-------|----------|
| 214150 x at | ATP6V0E1 | 0.52 | 2.20E-05 |  | 203633 at   | CPT1A    | -0.52 | 3.90E-05 |
| 212470 at   | SPAG9    | 0.52 | 1.00E-06 |  | 204798 at   | MYB      | -0.51 | 0.00E+00 |
| 218717 s at | LEPREL1  | 0.52 | 1.90E-05 |  | 209323 at   | PRKRIR   | -0.51 | 3.00E-05 |
| 202052 s at | RAI14    | 0.52 | 7.00E-06 |  | 218458 at   | GMCL1    | -0.51 | 2.50E-05 |
| 200673 at   | LAPTM4A  | 0.52 | 5.00E-06 |  | 202978 s at | CREBZF   | -0.51 | 2.90E-05 |
| 217785 s at | YKT6     | 0.52 | 1.40E-05 |  | 208643 s at | XRCC5    | -0.51 | 2.80E-05 |
| 203891 s at | DAPK3    | 0.52 | 2.30E-05 |  | 205393 s at | CHEK1    | -0.51 | 5.60E-05 |
| 223625 at   | FAM126A  | 0.52 | 3.10E-05 |  | 200041 s at | BAT1     | -0.51 | 7.60E-05 |
| 201098 at   | COPB2    | 0.52 | 2.60E-05 |  | 225887 at   | C13orf23 | -0.51 | 3.90E-05 |
| 212723 at   | JMJD6    | 0.52 | 1.80E-05 |  | 211475 s at | BAG1     | -0.50 | 4.20E-05 |
| 210762 s at | DLC1     | 0.52 | 1.40E-05 |  | 212138 at   | PDS5A    | -0.50 | 2.90E-05 |
| 204584 at   | L1CAM    | 0.52 | 3.10E-05 |  | 201035 s at | HADH     | -0.50 | 7.00E-06 |
| 229465 s at | PTPRS    | 0.52 | 3.10E-05 |  | 223711 s at | THYN1    | -0.50 | 4.50E-05 |
| 200643 at   | HDLBP    | 0.52 | 1.40E-05 |  | 213762 x at | RBMX     | -0.50 | 5.00E-05 |
| 220990 s at | MIR21    | 0.52 | 2.00E-06 |  | 208935 s at | LGALS8   | -0.50 | 1.30E-05 |
| 228776 at   | GJC1     | 0.52 | 3.00E-06 |  | 200069 at   | SART3    | -0.50 | 3.20E-05 |
| 241763 s at | FBXO32   | 0.51 | 4.40E-05 |  | 224610 at   | SNHG1    | -0.50 | 5.50E-05 |
| 225368 at   | HIPK2    | 0.51 | 3.00E-06 |  |             |          |       |          |
| 215489 x at | HOMER3   | 0.51 | 0.00E+00 |  |             |          |       |          |
| 224663 s at | CFL2     | 0.51 | 0.00E+00 |  |             |          |       |          |
| 212077 at   | CALD1    | 0.51 | 8.00E-06 |  |             |          |       |          |
| 204017 at   | KDELR3   | 0.51 | 5.00E-06 |  |             |          |       |          |
| 227239 at   | FAM126A  | 0.51 | 2.20E-05 |  |             |          |       |          |
| 200827 at   | PLOD1    | 0.51 | 1.50E-05 |  |             |          |       |          |
| 230146 s at | FREQ     | 0.51 | 3.90E-05 |  |             |          |       |          |
| 205717 x at | PCDHGA12 | 0.51 | 2.60E-05 |  |             |          |       |          |
| 209946 at   | VEGFC    | 0.51 | 5.10E-05 |  |             |          |       |          |
| 215706 x at | ZYX      | 0.51 | 1.00E-06 |  |             |          |       |          |
| 212667 at   | SPARC    | 0.51 | 4.00E-05 |  |             |          |       |          |
| 226893 at   | -        | 0.51 | 3.10E-05 |  |             |          |       |          |
| 200096 s at | ATP6V0E1 | 0.51 | 3.30E-05 |  |             |          |       |          |
| 202087 s at | CTSL1    | 0.51 | 0.00E+00 |  |             |          |       |          |
| 209263 x at | TSPAN4   | 0.51 | 2.30E-05 |  |             |          |       |          |
| 201536 at   | DUSP3    | 0.51 | 8.00E-06 |  |             |          |       |          |
| 226939 at   | CPEB2    | 0.51 | 3.20E-05 |  |             |          |       |          |
| 213112 s at | SQSTM1   | 0.51 | 7.50E-05 |  |             |          |       |          |
| 209079 x at | PCDHGA12 | 0.51 | 2.50E-05 |  |             |          |       |          |
| 211059 s at | GOLGA2   | 0.51 | 3.10E-05 |  |             |          |       |          |
| 208785 s at | MAP1LC3B | 0.50 | 2.20E-05 |  |             |          |       |          |
| 200983 x at | CD59     | 0.50 | 8.00E-06 |  |             |          |       |          |
| 207765 s at | KIAA1539 | 0.50 | 5.80E-05 |  |             |          |       |          |
| 224791 at   | ASAP1    | 0.50 | 3.30E-05 |  |             |          |       |          |
| 212090 at   | GRINA    | 0.50 | 1.10E-05 |  |             |          |       |          |
| 200661 at   | CTSA     | 0.50 | 1.00E-05 |  |             |          |       |          |
| 225116 at   | HIPK2    | 0.50 | 1.60E-05 |  |             |          |       |          |
| 208782 at   | FSTL1    | 0.50 | 4.90E-05 |  |             |          |       |          |

**Table S3: Correlation between the expression of proteins/phosphoproteins and the cell volume in the NCI60 cell lines.**

| Positively correlated                                                                                                    |      |        | Negatively correlated                                                                                      |       |        |
|--------------------------------------------------------------------------------------------------------------------------|------|--------|------------------------------------------------------------------------------------------------------------|-------|--------|
| Protein / Phosphoprotein                                                                                                 | PCC  | p      | Protein / Phosphoprotein                                                                                   | PCC   | p      |
| Vimentin 57kD                                                                                                            | 0.36 | 0.0017 | Phosphorylation of Cofilin at S3                                                                           | -0.22 | 0.0589 |
| AKT serine/threonine protein kinase                                                                                      | 0.32 | 0.0055 | E-cadherin protein                                                                                         | -0.20 | 0.0621 |
| Phosphorylation of 4EBP1 (EIF4EBP1 Eukaryotic translation initiation factor 4E binding protein 1) protein at T37 and T46 | 0.29 | 0.0228 | cleaved PARP (D214)                                                                                        | -0.20 | 0.0709 |
| Phosphorylation of A-RAF at S299                                                                                         | 0.28 | 0.0148 | Phosphorylation of VEGFR2 at Y951                                                                          | -0.19 | 0.0785 |
| Phosphorylation of ATF2 at T69 and/or T71                                                                                | 0.26 | 0.0246 | Phosphorylation of FRS2 alpha at Y436                                                                      | -0.15 | 0.1554 |
| Phosphorylation of ERK1/2 at T202 and/or Y204                                                                            | 0.21 | 0.0506 | Phosphorylation of EGFR at Y1068                                                                           | -0.14 | 0.1504 |
| Bub3                                                                                                                     | 0.20 | 0.0654 | ErbB2 (receptor protein-tyrosine kinase)                                                                   | -0.11 | 0.2049 |
| Phosphorylation of FAK at Y397                                                                                           | 0.20 | 0.0655 | Phosphorylation of BCR at Y177                                                                             | -0.11 | 0.2047 |
| Phosphorylation of Aurora A at T288, Aurora B at T232 and/or Aurora C at T198                                            | 0.20 | 0.0514 | Phosphorylation of ZAP70 at Y319 &/or SYK at Y352                                                          | -0.10 | 0.2212 |
| Phosphorylation of CREB at S133                                                                                          | 0.20 | 0.0624 | Phosphorylation of EGFR at Y845                                                                            | -0.10 | 0.2261 |
| Phosphorylation of PKC alpha at S657                                                                                     | 0.19 | 0.0683 | Phosphorylation of Acetyl CoA carboxylase at S79                                                           | -0.10 | 0.2333 |
| Phosphorylation of Arrestin 1 at S412                                                                                    | 0.19 | 0.0826 | Insulin Receptor beta                                                                                      | -0.09 | 0.2417 |
| Cyclin D1 protein                                                                                                        | 0.17 | 0.0940 | COX2 (PTGS2 Prostaglandin-endoperoxide synthase 2 (prostaglandin G/H synthase and cyclooxygenase)) protein | -0.07 | 0.2920 |
| Phosphorylation of PKC alpha/betaII at T638 and/or T641                                                                  | 0.17 | 0.0917 | Phosphorylation of PDGFR beta at Y751                                                                      | -0.07 | 0.2821 |
| Phosphorylation of Progesterone Receptor at S190                                                                         | 0.17 | 0.0990 | Phosphorylation of Src protein at Y416                                                                     | -0.07 | 0.2870 |
| Phosphorylation of ASK1 at S83                                                                                           | 0.17 | 0.1719 | cleaved Caspase 3 (D175)                                                                                   | -0.06 | 0.3042 |
| BMI1 (oncogene, DNA binding)                                                                                             | 0.16 | 0.1173 | Phosphorylation of LCK at Y505                                                                             | -0.06 | 0.3335 |
| ErbB3 (receptor protein-tyrosine kinase)                                                                                 | 0.15 | 0.1091 | Phosphorylation of TYK2 at Y1054 &/or Y1055                                                                | -0.06 | 0.3106 |
| Phosphorylation of MARCKS at S152 and/or S156                                                                            | 0.15 | 0.1250 | Phosphorylation of Src protein at Y527                                                                     | -0.05 | 0.3227 |
| 4EBP-1 (EIF4EBP1 Eukaryotic translation initiation factor 4E binding protein 1) protein                                  | 0.14 | 0.1408 | Phosphorylation of GAB1 at Y627                                                                            | -0.05 | 0.3326 |
| HIF-1alpha (Hypoxia inducible factor, basic helix-loop-helix transcription factor)                                       | 0.14 | 0.1461 | Phosphorylation of CrkL at Y207                                                                            | -0.05 | 0.3404 |
| PDGFRb (pdgf-b receptor, tyrosine kinase)                                                                                | 0.14 | 0.1427 | cleaved Caspase 6 (D162)                                                                                   | -0.05 | 0.3435 |
| Phosphorylation of PKC pan/betaII at S660                                                                                | 0.14 | 0.1369 | Phosphorylation of SHIP1 at Y1020                                                                          | -0.05 | 0.3223 |
| Phosphorylation of AKT on Ser473                                                                                         | 0.14 | 0.1496 | Phosphorylation of SHC at Y317                                                                             | -0.05 | 0.3372 |
| Phosphorylation of Bcl-2 at T56                                                                                          | 0.14 | 0.1522 | Phosphorylation of STAT3 protein at T727                                                                   | -0.04 | 0.3469 |
| Phosphorylation of TSC2 (Tuberous sclerosis 2) protein at T1462                                                          | 0.13 | 0.1494 | cleaved Caspase 7 (D198)                                                                                   | -0.04 | 0.3238 |
| Phosphorylation of eIF4G at S1108                                                                                        | 0.13 | 0.1627 | Phosphorylation of p38 (MAPK14 Mitogen-activated protein kinase 14) protein at T180/Y182                   | -0.04 | 0.3140 |
| Phosphorylation of NFkB p65 at S536                                                                                      | 0.13 | 0.1718 | Phosphorylation of STAT6 (Signal transducer and activator of transcription 6) protein at Y641              | -0.04 | 0.3404 |
| Epidermal growth factor receptor                                                                                         | 0.12 | 0.1893 | PLK1, polo-like kinase 1                                                                                   | -0.04 | 0.3355 |
| Phosphorylation of Histone H3 at S28                                                                                     | 0.11 | 0.1996 | Phosphorylation of VEGFR2 at Y996                                                                          | -0.04 | 0.3375 |
| Phosphorylation of Ask1 at Y284                                                                                          | 0.11 | 0.2043 | Phosphorylation of PLC gamma1 at Y783                                                                      | -0.03 | 0.3640 |
| SMAD 1/5/8 (S/S)                                                                                                         | 0.11 | 0.2098 | Phosphorylation of SMAD2 at S465 &/or 467                                                                  | -0.03 | 0.3503 |
| Phosphorylation of ATP Cytrate Lyase at S454                                                                             | 0.11 | 0.2135 | Phosphorylation of ErbB2 at Y1248                                                                          | -0.03 | 0.3631 |
| Bcl-2 (Apoptosis regulator)                                                                                              | 0.10 | 0.2309 | cleaved Lamin A (D230)                                                                                     | -0.03 | 0.3845 |
| Phosphorylation of FKHR at T24 and/or FKHL1 at T32                                                                       | 0.10 | 0.2320 | Phosphorylation of EGFR at Y1173                                                                           | -0.03 | 0.3480 |
| Phosphorylation of Adducin at S662                                                                                       | 0.09 | 0.2550 | Phosphorylation of c-Abl of Y245                                                                           | -0.02 | 0.3742 |
| Phosphorylation of RPS6 (Ribosomal protein S6) protein at S235 and S236                                                  | 0.09 | 0.2543 | Phosphorylation of MAPK8 (JNK, mitogen-activated protein kinase 8) protein at T183/Y185                    | -0.02 | 0.3715 |
| Phosphorylation of 4EBP1 (EIF4EBP1 Eukaryotic translation initiation factor 4E binding protein 1) protein at T70         | 0.09 | 0.2655 | Phosphorylation of Histone H3 at S10, mitosis maker                                                        | -0.02 | 0.3729 |
| Phosphorylation of EGFR at Y1045                                                                                         | 0.09 | 0.2657 | Phosphorylation of PDGFR beta at Y716                                                                      | -0.02 | 0.3744 |
| PTEN protein-tyrosine phosphatase                                                                                        | 0.09 | 0.2684 | Phosphorylation of RET at Y905                                                                             | -0.02 | 0.4118 |
| Phosphorylation of EGFR at S1046 and/or S1047                                                                            | 0.09 | 0.2663 | Phosphorylation of BAD (BCL2-associated agonist of cell death) protein at S112                             | -0.02 | 0.4311 |
| Phosphorylation of eNOS-NOSIII at S116                                                                                   | 0.08 | 0.2882 | Phosphorylation of FAK at Y576 and/or 577                                                                  | -0.02 | 0.3685 |
| Phosphorylation of RPS6 (Ribosomal protein S6) protein at S240 and S244                                                  | 0.08 | 0.2754 | Phosphorylation of Raf at S259                                                                             | -0.02 | 0.3866 |

|                                                                                                                  |      |        |                                                                             |       |        |
|------------------------------------------------------------------------------------------------------------------|------|--------|-----------------------------------------------------------------------------|-------|--------|
| Phosphorylation of EGFR at Y992                                                                                  | 0.08 | 0.2875 | Phosphorylation of SMAD2 at S245 &/or S250 &/or S255                        | -0.02 | 0.3825 |
| signal transducer and activator of transcription 3 (acute-phase response factor)                                 | 0.08 | 0.2875 | Smac/Diablo                                                                 | -0.02 | 0.3914 |
| Phosphorylation of CHK1 at S345                                                                                  | 0.08 | 0.2773 | CASP9, caspase 9, apoptosis-related cysteine protease                       | -0.01 | 0.3962 |
| Phosphorylation of AMPK alpha1 at S485                                                                           | 0.08 | 0.2985 | p38 (MAPK14 Mitogen-activated protein kinase 14) protein                    | -0.01 | 0.3962 |
| Phosphorylation of c-Kit at Y703                                                                                 | 0.08 | 0.2894 | p70S6K (RPS6KB1 Ribosomal protein S6 kinase, 70kDa, polypeptide 1) protein  | -0.01 | 0.4111 |
| Phosphorylation of EGFR at Y1148                                                                                 | 0.08 | 0.3155 | Phosphorylation of PKC zeta-lambda at T410 and/or T403                      | -0.01 | 0.3913 |
| Phosphorylation of p53 at S15                                                                                    | 0.07 | 0.3052 | Phosphorylation of MET at Y1234 and/or Y1235                                | -0.01 | 0.3890 |
| Phosphorylation of AMPK beta1 at S108                                                                            | 0.07 | 0.3245 | cyclin B1                                                                   | -0.01 | 0.4391 |
| Phosphorylation of PRAS40 at T246                                                                                | 0.07 | 0.3321 | Phosphorylation of PAK1 at S199 and/or S204 and/or PAK2 at S192 and/or S197 | -0.01 | 0.4037 |
| Phosphorylation of 4EBP1 (EIF4EBP1 Eukaryotic translation initiation factor 4E binding protein 1) protein at S65 | 0.07 | 0.3290 | Phosphorylation of PYK2 at Y402                                             | -0.01 | 0.4515 |
| Phosphorylation of FKHR at S256                                                                                  | 0.07 | 0.3330 | Phosphorylation of ALK at Y1586                                             | -0.01 | 0.4550 |
| Phosphorylation of T308 on AKT                                                                                   | 0.07 | 0.3088 | Phosphorylation of PKC theta at T538                                        | -0.01 | 0.4044 |
| ER (estrogen receptor) alpha protein                                                                             | 0.07 | 0.3014 | cleaved Caspase 9 (D315)                                                    | -0.01 | 0.4031 |
| Phosphorylation of mTOR (Mechanistic target of rapamycin (serine/threonine kinase)) protein at S2448             | 0.07 | 0.3453 |                                                                             |       |        |
| Phosphorylation of Ikb alpha at S32 and/or S36                                                                   | 0.06 | 0.3633 |                                                                             |       |        |
| Phosphorylation of c-Kit at Y719                                                                                 | 0.06 | 0.3537 |                                                                             |       |        |
| Cyclin A (Cell cycle regulation)                                                                                 | 0.06 | 0.3267 |                                                                             |       |        |
| Phosphorylation of CrkII at Y221                                                                                 | 0.05 | 0.3595 |                                                                             |       |        |
| Phosphorylation of FADD at S194                                                                                  | 0.05 | 0.3920 |                                                                             |       |        |
| Phosphorylation of ATF2 at T71                                                                                   | 0.05 | 0.3677 |                                                                             |       |        |
| Phosphorylation of Estrogen Receptor alpha at S118                                                               | 0.05 | 0.4112 |                                                                             |       |        |
| Phosphorylation of PDK1 (PDK1 3-phosphoinositide dependent protein kinase-1) protein at S241                     | 0.05 | 0.4023 |                                                                             |       |        |
| Beclin1                                                                                                          | 0.05 | 0.3848 |                                                                             |       |        |
| Phosphorylation of p27 of T187                                                                                   | 0.04 | 0.4362 |                                                                             |       |        |
| Phosphorylation of IRS1 at S612                                                                                  | 0.04 | 0.4369 |                                                                             |       |        |
| Phosphorylation of SGK1 (Serum/glucocorticoid regulated kinase 1) protein at S78                                 | 0.04 | 0.4444 |                                                                             |       |        |
| Phosphorylation of B-Raf at S445                                                                                 | 0.04 | 0.4044 |                                                                             |       |        |
| MEK 1/2 protein                                                                                                  | 0.04 | 0.4386 |                                                                             |       |        |
| Survivin                                                                                                         | 0.04 | 0.4370 |                                                                             |       |        |
| Phosphorylation of MEK1 and MEK2 proteins at S217/S221                                                           | 0.04 | 0.4564 |                                                                             |       |        |
| Phosphorylation of PTEN at S380                                                                                  | 0.04 | 0.4558 |                                                                             |       |        |
| Phosphorylation of Syk at Y525 &/or Y526                                                                         | 0.03 | 0.4711 |                                                                             |       |        |
| p53                                                                                                              | 0.03 | 0.4024 |                                                                             |       |        |
| Phosphorylation of RSK3 at T356 and/or S360                                                                      | 0.03 | 0.4580 |                                                                             |       |        |
| IRS1 (insulin receptor substrate 1) protein                                                                      | 0.03 | 0.4722 |                                                                             |       |        |
| Phosphorylation of C-RAF at S338                                                                                 | 0.03 | 0.4839 |                                                                             |       |        |
| mTOR (Mechanistic target of rapamycin (serine/threonine kinase)) protein                                         | 0.03 | 0.4749 |                                                                             |       |        |
| Phosphorylation of eNOS at S113                                                                                  | 0.03 | 0.4574 |                                                                             |       |        |
| Phosphorylation of BAD at S155                                                                                   | 0.03 | 0.4776 |                                                                             |       |        |
| Phosphorylation of IGF-1 Receptor at Y1135/1136/Insulin Receptor (Y1150/1151)                                    | 0.03 | 0.4101 |                                                                             |       |        |
| Phosphorylation of PRK1 at T774 and/or PRK2 at T816                                                              | 0.03 | 0.4680 |                                                                             |       |        |
| Phosphorylation of Chk2 at S33 and/or S35                                                                        | 0.03 | 0.4109 |                                                                             |       |        |
| Phosphorylation of BAD at S136                                                                                   | 0.03 | 0.4715 |                                                                             |       |        |
| Phosphorylation of p70 S6 Kinase at S371                                                                         | 0.03 | 0.5001 |                                                                             |       |        |
| Phosphorylation of ErbB3 at Y1197                                                                                | 0.03 | 0.5001 |                                                                             |       |        |
| Phosphorylation of SHP2 at Y580                                                                                  | 0.03 | 0.5081 |                                                                             |       |        |
| Phosphorylation of Bcl-2 at S70                                                                                  | 0.03 | 0.5007 |                                                                             |       |        |
| CREB protein                                                                                                     | 0.02 | 0.5019 |                                                                             |       |        |
| Phosphorylation of RAS-GFR1 at S916                                                                              | 0.02 | 0.5036 |                                                                             |       |        |
| Bad (BCL2-antagonist of cell death)                                                                              | 0.02 | 0.4822 |                                                                             |       |        |
| Phosphorylation of SEK1-MKK4 at S80                                                                              | 0.02 | 0.5118 |                                                                             |       |        |
| Phosphorylation of PKC delta at T505                                                                             | 0.02 | 0.5229 |                                                                             |       |        |
| Phosphorylation of p90RSK at S380                                                                                | 0.02 | 0.4965 |                                                                             |       |        |
| Bax (BCL2-associated X protein)                                                                                  | 0.02 | 0.5022 |                                                                             |       |        |

|                                                                                                       |      |        |  |  |  |
|-------------------------------------------------------------------------------------------------------|------|--------|--|--|--|
| Phosphorylation of eNOS at S1177                                                                      | 0.02 | 0.4352 |  |  |  |
| X-IAP (x-linked inhibitor of apoptosis)                                                               | 0.02 | 0.5139 |  |  |  |
| Phosphorylation of IGF1 Receptor at Y1131 and/or Insulin Receptor at Y1146                            | 0.02 | 0.5183 |  |  |  |
| Phosphorylation of LKB1 at S334                                                                       | 0.02 | 0.5210 |  |  |  |
| Phosphorylation of STAT3 protein at Y705                                                              | 0.02 | 0.4512 |  |  |  |
| Phosphorylation of p40 phox at T154                                                                   | 0.02 | 0.4772 |  |  |  |
| Phosphorylation of c-Abl of T735                                                                      | 0.02 | 0.5289 |  |  |  |
| Phosphorylation of mTOR at S2481                                                                      | 0.02 | 0.5280 |  |  |  |
| Phosphorylation of VEGFR2 at Y1175                                                                    | 0.02 | 0.5296 |  |  |  |
| Phosphorylation of PAK1 at T423 and/or PAK2 at T402                                                   | 0.02 | 0.5498 |  |  |  |
| Phosphorylation of Mst1 at T183 and/or Mst 2 at T180                                                  | 0.02 | 0.5401 |  |  |  |
| Phosphorylation of MSK1 at S360                                                                       | 0.01 | 0.5391 |  |  |  |
| Phosphorylation of ErbB3 at Y1289                                                                     | 0.01 | 0.5420 |  |  |  |
| Bak (BCL2-antagonist/killer 1)                                                                        | 0.01 | 0.5019 |  |  |  |
| Phosphorylation of PLK1 at T210                                                                       | 0.01 | 0.5580 |  |  |  |
| Phosphorylation of Jak2 at Y1007 and/or Y1008                                                         | 0.01 | 0.5496 |  |  |  |
| Phosphorylation of ACK1 at Y857 and/or Y858                                                           | 0.01 | 0.5495 |  |  |  |
| Phosphorylation of TUBERIN TSC2 at Y1571                                                              | 0.01 | 0.5516 |  |  |  |
| ErbB4 (receptor protein-tyrosine kinase)                                                              | 0.01 | 0.5462 |  |  |  |
| Phosphorylation of FKHL1 at S253                                                                      | 0.01 | 0.5613 |  |  |  |
| Phosphorylation of beta Catenin at T41 and/or S45                                                     | 0.01 | 0.5414 |  |  |  |
| Phosphorylation of p70 S6 Kinase at T412                                                              | 0.01 | 0.5469 |  |  |  |
| Phosphorylation of cPLA2 at S505                                                                      | 0.01 | 0.5530 |  |  |  |
| Phosphorylation of PKA C at T197                                                                      | 0.01 | 0.5570 |  |  |  |
| Phosphorylation of LKB1 (STK11 serine/threonine kinase 11) protein at S428                            | 0.01 | 0.5597 |  |  |  |
| Phosphorylation of Ezrin at T156, Radixin at T564, and/or Moesin at T558                              | 0.01 | 0.5664 |  |  |  |
| Phosphorylation of STAT2 at Y690                                                                      | 0.01 | 0.5411 |  |  |  |
| Phosphorylation of p70S6K (RPS6KB1 Ribosomal protein S6 kinase, 70kDa, polypeptide 1) protein at T389 | 0.01 | 0.5607 |  |  |  |
| Phosphorylation of Paxillin at Y118                                                                   | 0.00 | 0.5514 |  |  |  |
| Phosphorylation of Elk1 at S383                                                                       | 0.00 | 0.5751 |  |  |  |
| cleaved Caspase 9 (D330)                                                                              | 0.00 | 0.5631 |  |  |  |
| Phosphorylation of GSK3 alpha at Y279 and/or GSK3 beta at Y216                                        | 0.00 | 0.5722 |  |  |  |
| Phosphorylation of eIF4E at S209                                                                      | 0.00 | 0.4562 |  |  |  |
| Phosphorylation of JAK1 at Y1022 and/or Y1023                                                         | 0.00 | 0.4194 |  |  |  |
| KIT (receptor for stem cell factor, tyrosine kinase)                                                  | 0.00 | 0.5002 |  |  |  |
| Phosphorylation of GSK3 alpha/beta at S21and or S9                                                    | 0.00 | 0.4331 |  |  |  |
| ERK 1/2 protein                                                                                       | 0.00 | 0.4224 |  |  |  |
| Phosphorylation of STAT5 protein at Y694                                                              | 0.00 | 0.4802 |  |  |  |
| Phosphorylation of STAT1 at Y701                                                                      | 0.00 | 0.4367 |  |  |  |
| Bcl-x1 (BCL2-like 1)                                                                                  | 0.00 | 0.4249 |  |  |  |
| Phosphorylation of VAV3 at Y173                                                                       | 0.00 | 0.4066 |  |  |  |

**Table S4: FDA approved drugs included in the *in vitro* growth inhibition analysis.** NSC stands for National Service Center and it is the identifier utilized by the Department of Therapeutics Program at the National Cancer Institute [22].

| NSC    | Mechanism of Action            | Name                                          |
|--------|--------------------------------|-----------------------------------------------|
| 177023 | Alkaline Phosphatase Inhibitor | Levamisole                                    |
| 13875  | Alkylating Agents              | Altretamine                                   |
| 409962 | Alkylating Agents              | BCNU                                          |
| 125066 | Alkylating Agents              | Bleomycin                                     |
| 750    | Alkylating Agents              | Busulfan                                      |
| 241240 | Alkylating Agents              | Carboplatin                                   |
| 3088   | Alkylating Agents              | Chlorambucil                                  |
| 119875 | Alkylating Agents              | Cisplatin                                     |
| 26271  | Alkylating Agents              | Cyclophosphamide                              |
| 45388  | Alkylating Agents              | Dacarbazine                                   |
| 109724 | Alkylating Agents              | Ifosfamide                                    |
| 79037  | Alkylating Agents              | Lomustine                                     |
| 8806   | Alkylating Agents              | Melphalan                                     |
| 26980  | Alkylating Agents              | Mitomycin C                                   |
| 762    | Alkylating Agents              | Nitrogen mustard                              |
| 266046 | Alkylating Agents              | Oxaliplatin                                   |
| 25154  | Alkylating Agents              | Pipobroman                                    |
| 6396   | Alkylating Agents              | Thiotepa                                      |
| 9706   | Alkylating Agents              | Tretamin                                      |
| 34462  | Alkylating Agents              | Uracil mustard                                |
| 628503 | Antimitotic Agents             | Docetaxel                                     |
| 608210 | Antimitotic Agents             | Navelbine                                     |
| 125973 | Antimitotic Agents             | Taxol                                         |
| 49842  | Antimitotic Agents             | Vinblastine                                   |
| 67574  | Antimitotic Agents             | Vincristine                                   |
| 719344 | Aromatase Inhibitor            | Anastrozole                                   |
| 713563 | Aromatase Inhibitor            | Exemestane                                    |
| 719345 | Aromatase Inhibitor            | Letrozole                                     |
| 23759  | Aromatase Inhibitor            | Testolactone                                  |
| 719627 | COX-2 Inhibitor                | Celebrex                                      |
| 27640  | DNA Antimetabolites            | 5-Fluorouracil deoxyriboside                  |
| 63878  | DNA Antimetabolites            | Ara-C                                         |
| 287459 | DNA Antimetabolites            | Cytarabine                                    |
| 127716 | DNA Antimetabolites            | Decitabine                                    |
| 312887 | DNA Antimetabolites            | Fludarabine phosphate                         |
| 613327 | DNA Antimetabolites            | Gemcitabine                                   |
| 32065  | DNA Antimetabolites            | Hydroxyurea                                   |
| 218321 | DNA Antimetabolites            | Pentostatin                                   |
| 752    | DNA Antimetabolites            | Thioguanine                                   |
| 755    | DNA Antimetabolites            | Thiopurine                                    |
| 71423  | Estrogen analog                | Ethinyl Estradiol                             |
| 719276 | Estrogen Receptor Antagonist   | Fulvestrant                                   |
| 180973 | Estrogen Receptor Antagonist   | Tamoxifen                                     |
| 226080 | mTOR inhibitor                 | Rapamycin                                     |
| 683864 | mTOR inhibitors                | Temsirolimus                                  |
| 733504 | mTOR inhibitors                | Everolimus                                    |
| 105014 | DNA Antimetabolites            | Cladribine                                    |
| 686673 | NA                             | 2-Amino-6-methoxypurine arabinoside           |
| 713563 | NA                             | 6-Methylenandrosta-1,4-diene-3,17-dione       |
| 14229  | NA                             | Acrichine                                     |
| 369100 | NA                             | Aldara                                        |
| 246131 | NA                             | Antibiotic AD 32                              |
| 92859  | NA                             | Arsenic Oxide, As <sub>2</sub> O <sub>3</sub> |
| 706363 | NA                             | Arsenic Trioxide                              |

|        |                                       |                                               |
|--------|---------------------------------------|-----------------------------------------------|
| 1390   | NA                                    | Bleminol                                      |
| 3590   | NA                                    | Calcium folinate                              |
| 88536  | NA                                    | Calusterone                                   |
| 38721  | NA                                    | Chloditan                                     |
| 702294 | NA                                    | Estramustine sodium phosphate                 |
| 296961 | NA                                    | Ethiofos                                      |
| 12198  | NA                                    | Masterone/Econazole                           |
| 45923  | NA                                    | Meladinine                                    |
| 279836 | Topoisomerase II Inhibitors           | Mitoxantrone                                  |
| 23162  | NA                                    | Nandrolin                                     |
| 77213  | NA                                    | Natunalar                                     |
| 18509  | NA                                    | Pentanoic acid, 5-amino-4-oxo-, hydrochloride |
| 256942 | NA                                    | Pidorubicin hydrochloride                     |
| 122758 | NA                                    | Retinoic acid                                 |
| 701852 | NA                                    | SAHA                                          |
| 362856 | NA                                    | Temozolomide                                  |
| 113891 | NA                                    | Uromitexan                                    |
| 66847  | NA                                    | Yodomin                                       |
| 85998  | O-GlcNAc Inhibitor                    | Streptozocin                                  |
| 681239 | Proteasome Inhibitor                  | Bortezomib                                    |
| 698037 | RNA/DNA Antimetabolites               | Pemetrexed                                    |
| 102816 | RNA/DNA Antimetabolites               | Azacytidine                                   |
| 712807 | RNA/DNA Antimetabolites               | Capecitabine                                  |
| 606869 | RNA/DNA Antimetabolites               | Clofarabine                                   |
| 19893  | RNA/DNA Antimetabolites               | Fluorouracil                                  |
| 740    | RNA/DNA Antimetabolites               | Methotrexate                                  |
| 82151  | Topoisomerase II Inhibitors           | Daunorubicin                                  |
| 123127 | Topoisomerase II Inhibitors           | Doxorubicin                                   |
| 141540 | Topoisomerase II Inhibitors           | Etoposide                                     |
| 169780 | Topoisomerase II Inhibitors           | ICRF-187                                      |
| 256439 | Topoisomerase II Inhibitors           | Idarubicin                                    |
| 122819 | Topoisomerase II Inhibitors           | Teniposide                                    |
| 616348 | Topoisomerase I Inhibitors            | Irinotecan                                    |
| 609699 | Topoisomerase I Inhibitors            | Topotecan                                     |
| 3053   | Transcription/DNA synthesis Inhibitor | Actinomycin D                                 |
| 24559  | Transcription/DNA synthesis Inhibitor | Mithramycin                                   |
| 697979 | Translation Inhibitor                 | Ontak                                         |
| 732517 | Tyrosine Kinase Inhibitor             | Dasatinib                                     |
| 718781 | Tyrosine Kinase Inhibitor             | Erlotinib                                     |
| 715055 | Tyrosine Kinase Inhibitor             | Gefitinib                                     |
| 688097 | Tyrosine Kinase Inhibitor             | Herceptin                                     |
| 743414 | Tyrosine Kinase Inhibitor             | Imatinib                                      |
| 632307 | Tyrosine Kinase Inhibitor             | Lapatinib                                     |
| 747599 | Tyrosine Kinase Inhibitor             | Nilotinib                                     |
| 747971 | Tyrosine Kinase Inhibitor             | Sorafenib                                     |
| 750690 | Tyrosine Kinase Inhibitor             | Sunitinib                                     |
| 633782 | Sterol Synthesis Inhibitor            | Simvastatin                                   |
| 633781 | Sterol Synthesis Inhibitor            | Lovastatin                                    |
| 281245 | Sterol Synthesis Inhibitor            | Mevastatin                                    |

| Cell line      | Protein synthesis rate (fmol/hour/cell) | Protein content (ng/cell) |
|----------------|-----------------------------------------|---------------------------|
| BR:BT-549      | 89                                      | 0.262                     |
| BR:HS578T      | 128                                     | 0.295                     |
| BR:MCF7        | 70                                      | 0.185                     |
| BR:MDA-MB-231  | 47                                      | 0.241                     |
| BR:T-47D       | 52                                      | 0.253                     |
| CNS:SF-268     | 55                                      | 0.308                     |
| CNS:SF-295     | 285                                     | 0.411                     |
| CNS:SF-539     | 90                                      | 0.394                     |
| CNS:SNB-19     | 111                                     | 0.326                     |
| CNS:SNB-75     | 77                                      | 0.786                     |
| CNS:U251       | 78                                      | 0.361                     |
| CO:COLO205     | 64                                      | 0.257                     |
| CO:HCC-2998    | 125                                     | 0.279                     |
| CO:HCT-116     | 114                                     | 0.202                     |
| CO:HCT-15      | 69                                      | 0.179                     |
| CO:HT29        | 99                                      | 0.250                     |
| CO:KM12        | 35                                      | 0.198                     |
| CO:SW-620      | 61                                      | 0.132                     |
| LC:A549/ATCC   | 74                                      | 0.244                     |
| LC:EKVX        | 55                                      | 0.413                     |
| LC:HOP-62      | 73                                      | 0.389                     |
| LC:HOP-92      | 128                                     | 0.560                     |
| LC:NCI-H226    | 65                                      | 0.550                     |
| LC:NCI-H23     | 50                                      | 0.378                     |
| LC:NCI-H322M   | 73                                      | 0.221                     |
| LC:NCI-H460    | 57                                      | 0.322                     |
| LC:NCI-H522    | 67                                      | 0.465                     |
| LE:CCRF-CEM    | 43                                      | 0.076                     |
| LE:HL-60       | 62                                      | 0.162                     |
| LE:K-562       | 133                                     | 0.231                     |
| LE:MOLT-4      | 33                                      | 0.101                     |
| LE:RPMI-8226   | 139                                     | 0.167                     |
| LE:SR          | 45                                      | 0.021                     |
| ME:LOXIMVI     | 124                                     | 0.283                     |
| ME:M14         | 82                                      | 0.259                     |
| ME:MALME-3M    | 61                                      | 0.319                     |
| ME:MDA-MB-435  | 90                                      | 0.211                     |
| ME:MDA-N       | NA                                      | NA                        |
| ME:SK-MEL-2    | 143                                     | 0.301                     |
| ME:SK-MEL-28   | 181                                     | 0.345                     |
| ME:SK-MEL-5    | 191                                     | 0.294                     |
| ME:UACC-257    | 49                                      | 0.254                     |
| ME:UACC-62     | 107                                     | 0.664                     |
| OV:IGROV1      | 124                                     | 0.308                     |
| OV:OVCAR-3     | 60                                      | 0.257                     |
| OV:OVCAR-4     | 65                                      | 0.441                     |
| OV:OVCAR-5     | 35                                      | 0.230                     |
| OV:OVCAR-8     | 34                                      | 0.234                     |
| OV:OVCAR-8/ADR | 51                                      | 0.285                     |
| OV:SK-OV-3     | 56                                      | 0.257                     |
| PR:DU-145      | 58                                      | 0.390                     |
| PR:PC-3        | 154                                     | 0.606                     |
| RE:786-0       | 79                                      | 0.372                     |
| RE:A498        | 97                                      | 0.426                     |
| RE:ACHN        | 155                                     | 0.279                     |
| RE:CAKI-1      | 101                                     | 0.555                     |
| RE:RXF-393     | 117                                     | 0.581                     |
| RE:SN12C       | 62                                      | 0.214                     |
| RE:TK-10       | 46                                      | 0.373                     |
| RE:UO-31       | 46                                      | 0.215                     |

**Table S5:** MLE protein synthesis rates and measured protein content for each NCI60 cell line.



| Amino acid    | $\sigma_a$ (fmol/cell/hour) |
|---------------|-----------------------------|
| isoleucine    | 2.0                         |
| leucine       | 2.1                         |
| lysine        | 2.5                         |
| methionine    | 2.6                         |
| phenylalanine | 2.6                         |
| threonine     | 2.8                         |
| tryptophan    | 2.9                         |
| valine        | 2.9                         |

**Table S6:** Maximum likelihood estimate of the variances ( $\sigma_a$ ). The value for histidine is not shown because its exchange fluxes were not reported.
